# Supplementary material for: Immunoglobulin G subclasses confer protection against Staphylococcus aureus bloodstream dissemination through distinct mechanisms in mouse models
Source: PubMed Central journal article supplement — Proc Natl Acad Sci U S A. 2023 Mar 27;120(14):e2220765120. doi: 10.1073/pnas.2220765120 (PMC10083571; doi:10.1073/pnas.2220765120), 2023-03-27
Supplement: pnas.2220765120.sapp.pdf [file pnas.2220765120.sapp.pdf]

## **Supporting Information for Immunoglobulin G subclasses confer protection against *S. aureus* bloodstream infection through distinct mechanisms in mouse models**

Xinhai Chen<sup>1,2</sup>, Haley Gula<sup>1§</sup>, Tonu Pius<sup>1§</sup>, Chong Ou<sup>3</sup>, Margaryta Gomozkova<sup>3</sup>, Lai-Xi Wang<sup>3</sup>, Olaf Schneewind<sup>†</sup>, Dominique Missiakas<sup>1\*</sup>

\*Corresponding author: Dominique Missiakas

Email: [dmissiak@bsd.uchicago.edu](mailto:dmissiak@bsd.uchicago.edu)

### **This PDF file includes:**

Figures S1 to S6  
Tables S1 to S4  
Legends for Datasets S1 and S2  
SI References

### **Other supporting materials for this manuscript include the following:**

Datasets S1 and S2

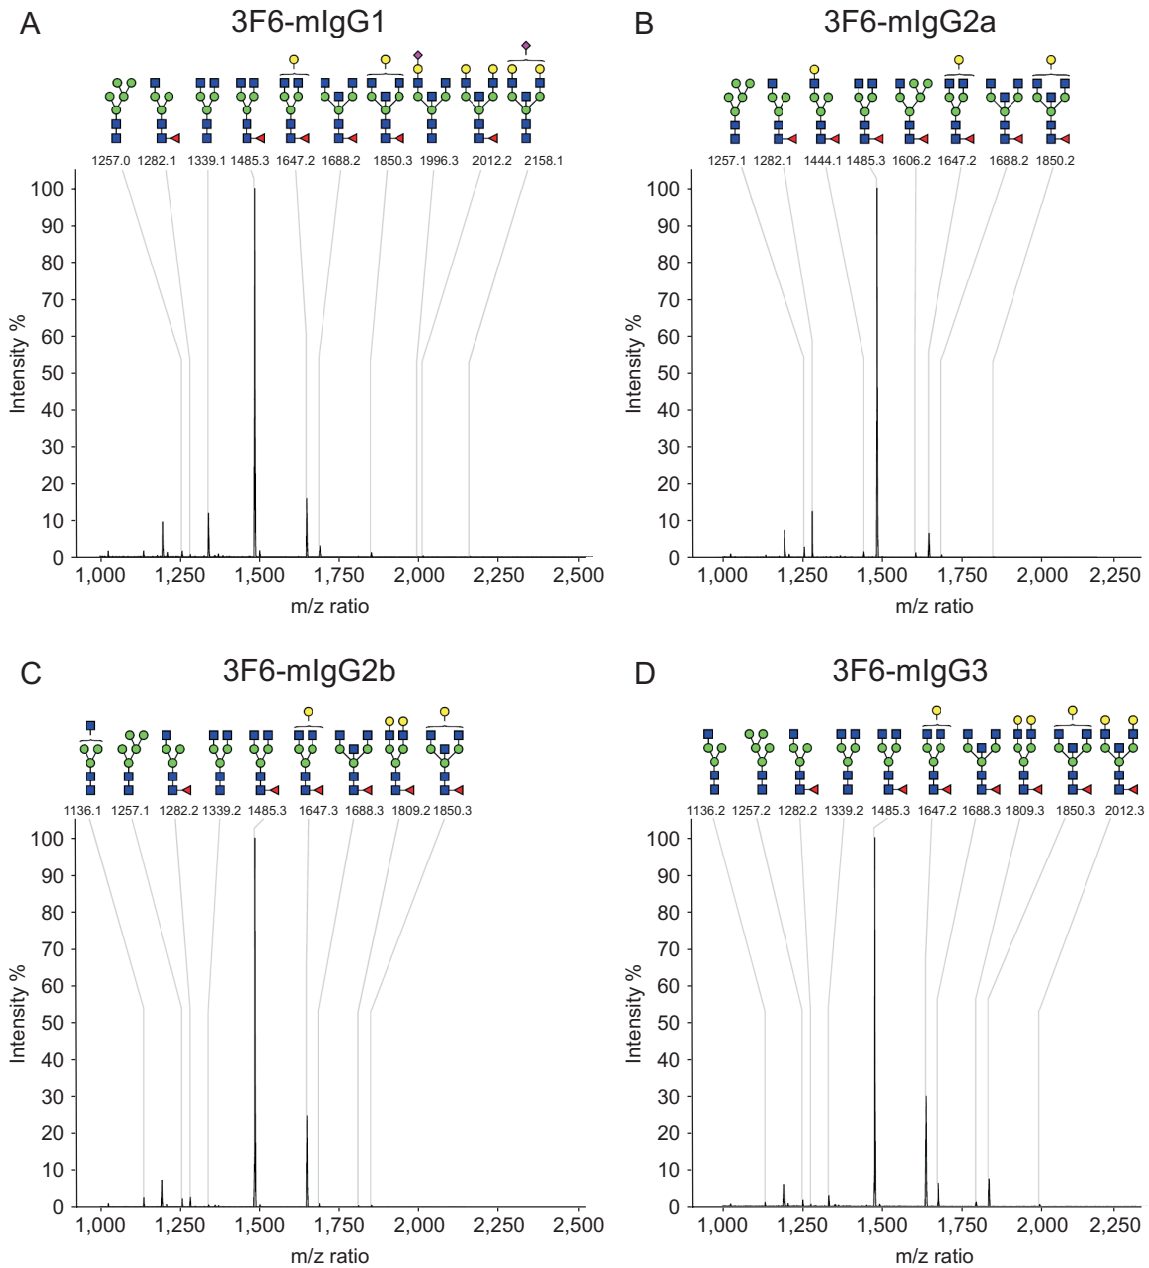

**Fig. S1.** Analysis of N-glycan composition of 3F6-mIgGs. The N-glycans from the mouse IgG subclasses were released and analyzed as previously described (1, 2). Briefly, the N-glycans were released from the respective antibody (100  $\mu$ g) by treatment with PFNase F (200 units, New England Biolabs) at 37°C in a phosphate buffer (50 mM, pH 7.5, final volume, 50 ml). Released N-glycans were isolated with porous graphite carbon solid phase extraction and their composition analyzed by MALDI-TOF MS using a Bruker Autoflex III MALDI-TOF mass spectrometer (Bruker Daltonics) with 2,5-dihydroxybenzoic acid (10 mg/ml in 10% ethanol containing 10 mM NaCl) as the matrix in reflector positive mode.

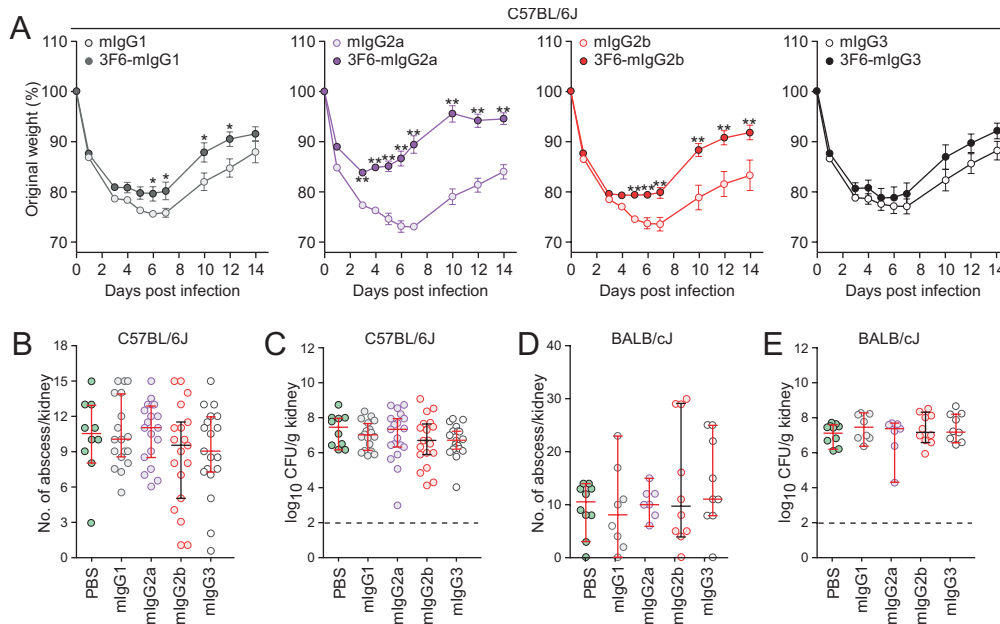

**Fig. S2.** Impact of passive immunization in mice challenged with *S. aureus* MW2. (A) Body weight of infected mice ( $n = 10$ , representative of two independent experiment) shown in panels E, F of Fig. 1 and panels B, C of this figure display. Data were analyzed with the two-way Repeated Measure ANOVA with Bonferroni's multiple comparisons test ( $*P < 0.05$ ;  $**P < 0.01$ ). (B-E) Enumeration of tissue surface abscesses (B, D) and bacterial loads in kidney tissues (CFU/g) (C, E) following 15 days infection with *S. aureus* MW2 of C57BL/6J (D, C) or BALB/cJ (D, E) mice. Animals received PBS or 10 mg/kg (body weight, b.w.) subclass control antibodies prior to challenge with *S. aureus*. These experiments were performed in parallel of passive immunization studies shown in Fig. 1E-H. Data are presented as mean  $\pm$  SEM (A) or medians  $\pm$  95% CI (B-E). The dashed line (in C and E) indicates the limit of detection. The complete dataset is analyzed in *SI Appendix*, Table S3.

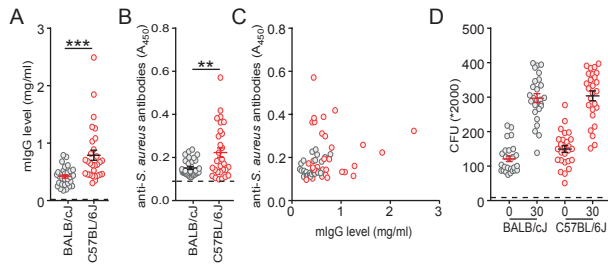

**Fig. S3.** Pre-existing anti-*S. aureus* antibodies do not have OPK activity. (A) Total mouse IgG titers in sera of naïve BALB/cJ and C57BL/6J mice. (B) Anti-*S. aureus* (anti-SA) titers in sera of naïve BALB/cJ and C57BL/6J mice shown in panel A were measured by ELISA. Live bacteria lacking the immunoglobulin binders SpA and Sbi ( $\Delta spa\Delta sbi$  bacteria) were coated on the plate and incubated with naïve mouse sera diluted 1:100 in PBS. As a negative control, we use sera from naïve  $\mu$ MT mice that do not produce IgG. This is depicted by the dashed line as the limit of detection. (C) Plot of total versus anti-SA IgG concentrations shown in panels A and B. In general, naïve C57BL/6J mice have higher pre-existing anti-SA antibodies than naïve BALB/cJ mice. However, naïve C57BL/6J mice also produce more total IgGs than naïve BALB/cJ mice. (D) Bacterial survival in blood. CFU of MW2 bacteria incubated for 0 and 30 minutes in freshly drawn, anti-coagulated, mouse blood shown in panel A. A correlation between pre-existing anti-SA antibodies and OPK activity was not observed. Each circle or square represents blood or serum from one animal. Data are presented as mean  $\pm$  SEM and significant differences were identified with the two-tailed Student's *t* test (\*\* $P < 0.01$ ; \*\*\* $P < 0.001$ ).

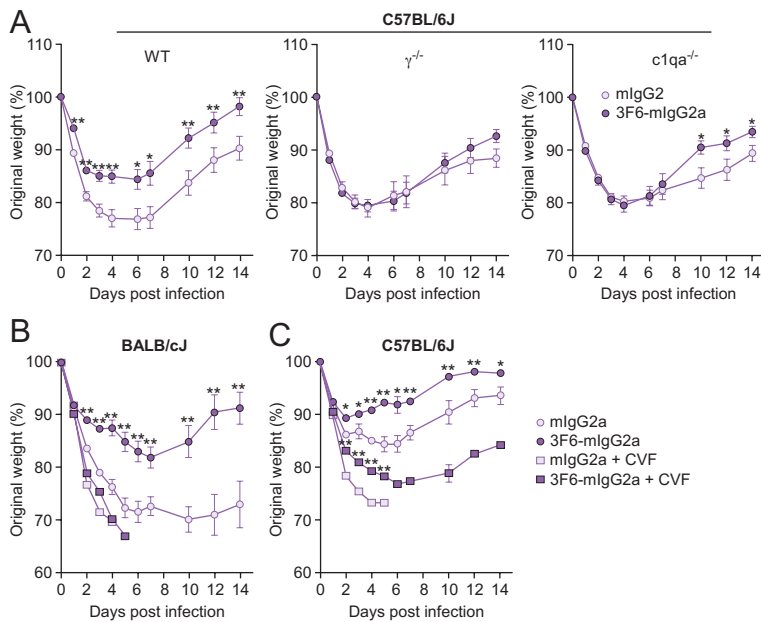

**Fig. S4.** Body weight of *S. aureus* MW2-infected mice. (A) Body weight of animals shown in Fig. 3A, B and corresponding to C57BL/6J wild-type (WT),  $\gamma^{-/-}$ , and  $c1qa^{-/-}$  mice ( $n = 10$ , representative of two independent experiment) that received mlgG2a or 3F6-mlgG2a before challenge with *S. aureus* MW2. (B, C) Body weight of animals shown in Fig. 3C and Fig. 3D, respectively. In these experiments, animals received mlgG2a or 3F6-mlgG2a without or with CVF prior to challenge with *S. aureus* MW2. Data are presented as mean  $\pm$  SEM and analyzed with the two-way Repeated Measure ANOVA with Bonferroni's multiple comparisons test ( $*P < 0.05$ ;  $**P < 0.01$ ).

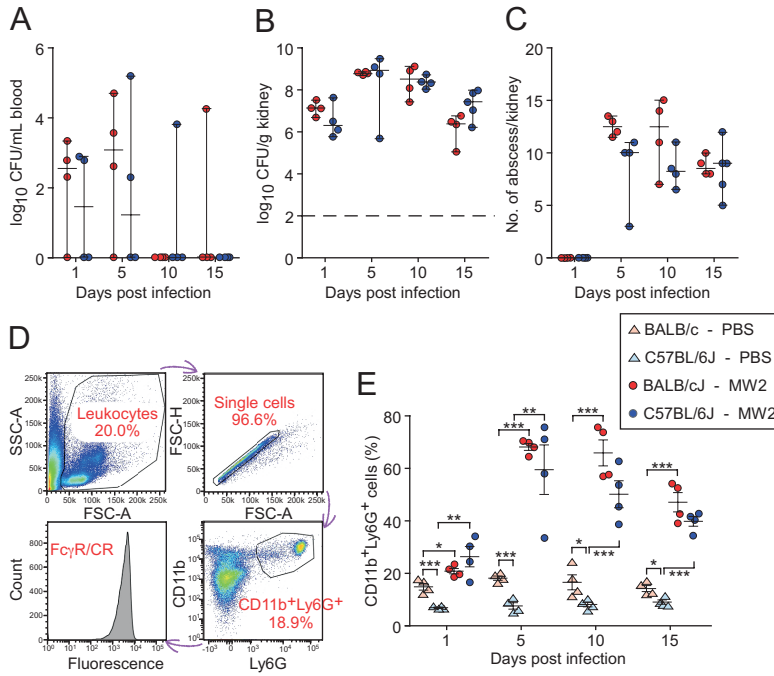

**Fig. S5.** Surface display of Fc $\gamma$ R and CRs in BALB/cJ and C57BL/6J mice with or without *S. aureus* infection. (A-C) Animals ( $n = 4$  to 5 mice per group) received PBS or *S. aureus* MW2 infection and were euthanized at day 1, 5, 10, or 15 post infection to collect blood and kidneys. Bacterial replication was examined as CFU/ml of blood (A), CFU/g of kidney (B), and surface abscess lesions in kidneys (C). The dashed line in (B) indicates the limit of detection. (D) Flow cytometry scheme for the quantification of CD11b<sup>+</sup>Ly6G<sup>+</sup> cells (neutrophils) and quantification of surface levels of Fc $\gamma$ R and CRs shown in Fig. 5. (E) Quantification of neutrophils from the blood of BALB/cJ and C57BL/6J mice infected with PBS or *S. aureus* MW2. Data are presented as medians  $\pm$  95% CI (A-C) or mean  $\pm$  SEM (E). Significant differences were identified with the two-way ANOVA with Tukey test (\*\*\* $P$  < 0.001; \*\* $P$  < 0.01; \* $P$  < 0.05).

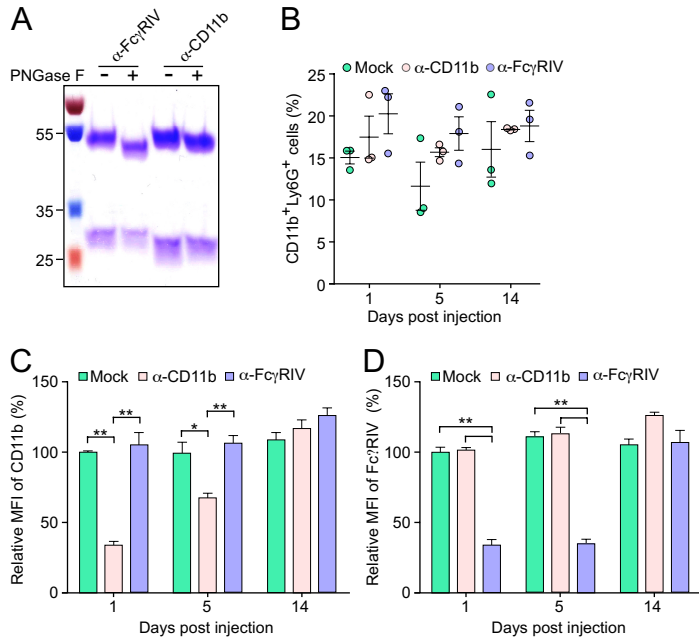

**Fig. S6.** Employing antibodies to block FcγRIV and CR3 in animals. (A) Coomassie-stained gel of anti-FcγRIV (α-FcγRIV) and anti-CR3 (α-CD11b) following PNGase F treatment. (B) Enumeration of neutrophils on days 1, 5, 14, following injection with mock or PNGase F-treated α-FcγRIV and α-CD11b antibodies in BALB/cJ mice ( $n = 3$ ). (C, D) Flow cytometry analysis of surface levels of CR3 (C) and FcγRIV (D) on neutrophils from animals shown in panel B. 100% corresponds to the MFI measured for each receptor in the mock (PBS) samples at day one. Data are presented as mean  $\pm$  SEM. Significant differences were identified with the two-way ANOVA with Tukey test (\*\* $P < 0.01$ ; \* $P < 0.05$ ).

**Table S1.** Amino acid sequences of the heavy and light chains of 3F6-mIgG antibodies used in this study.

| <b>Heavy Chains</b>                               |                                                                                                                                                                                                                                                                                                                                                                                                                                                                                                                                 |
|---------------------------------------------------|---------------------------------------------------------------------------------------------------------------------------------------------------------------------------------------------------------------------------------------------------------------------------------------------------------------------------------------------------------------------------------------------------------------------------------------------------------------------------------------------------------------------------------|
| Antibody name and accession number                | Amino acid sequence<br>(red variable segment; black constant region)                                                                                                                                                                                                                                                                                                                                                                                                                                                            |
| >3F6-mIgG1<br><br>mIgG1: Uniprot No. P01868       | MDLRLTYVFIVAILKGVLCVQLVETGGGLVQPKGSLKLSCAASGFTFNTN<br>AMNWVRQAPGKGLEWVARIRSKSNNYATYYADSVKDRFSISRDDSQNM<br>LSLQMNNLKTEDTAIYYCVTEHYDYDYVMDYWGQGSTVTVSSAKTTPP<br>SVYPLAPGSAAQTNSMVTLGCLVKGYFPEPVTVTWNSGSLSSGVHTFPA<br>VLQSDLYTLSSSVTVSPSPRPSETVTCNVAHPASSTKVDDKIVPRDCGCK<br>PCICTVPEVSSVFIFPPKPKDVLITLTPKVTCVVVDISKDDPEVQFSWFVD<br>DVEVHTAQTQPREEQFNSTFRSVSELPIMHQDWLNGKEFKCRVNSAAF<br>PAPIEKTISKTKGRPKAPQVYTIPPPKEQMAKDKVSLTCMITDFFPEDITVE<br>WQWNGQPAENYKNTQPIMNTNGSYFVYSKLVNQQSNWEAGNTFTCSV<br>LHEGLHNHHTKSLSHSPGK              |
| >3F6-mIgG2a<br><br>mIgG2a: Uniprot No. P01863     | MDLRLTYVFIVAILKGVLCVQLVETGGGLVQPKGSLKLSCAASGFTFNTN<br>AMNWVRQAPGKGLEWVARIRSKSNNYATYYADSVKDRFSISRDDSQNM<br>LSLQMNNLKTEDTAIYYCVTEHYDYDYVMDYWGQGSTVTVSSAKTTAP<br>SVYPLAPVCGDTTGSSVTLGCLVKGYFPEPVTLTWNSGSLSSGVHTFPA<br>VLQSDLYTLSSSVTVTSSTWPSQSITCNVAHPASSTKVDDKIEPRGPTIKP<br>CPPCKCPAPNLLGGPSVFIFPPKIKDVLMSLSPIVTCVVVDVSEDDPDVQI<br>SWFVNNVEVHTAQTQTHREDYNSTLRVVSALPIQHQDWMMSGKEFKCKV<br>NNKDLPAPIERTISKPKGSVRAPQVYVLPPEEEMTKKQVTLTCMVTDFM<br>PEDIYVEWTNNGKTELNYKNTEPVLDSGYSYFMYSKLRVEKKNWVERN<br>SYSCSVHEGLHNHHTTKSFSRTPGK        |
| >3F6-mIgG2b<br><br>mIgG2b: Uniprot No. A0A075B5P3 | MDLRLTYVFIVAILKGVLCVQLVETGGGLVQPKGSLKLSCAASGFTFNTN<br>AMNWVRQAPGKGLEWVARIRSKSNNYATYYADSVKDRFSISRDDSQNM<br>LSLQMNNLKTEDTAIYYCVTEHYDYDYVMDYWGQGSTVTVSSAKTTPP<br>SVYPLAPGCGDTTGSSVTLGCLVKGYFPESVTVTWNSGSLSSSVHTFPA<br>LLQSGLYTMSSSVTVPSSTWPSQVTVCVAHPASSTTVDDKLEPSGPIST<br>INPCPPCKECHKCPAPNLEGGPSVFIFPPNIKDVLMSLTPKVTCVVVDVS<br>EDDPDVRISWFVNNVEVHTAQTQTHREDYNSTIRVVSALPIQHQDWMMSG<br>KEFKCKVNNKDLPSPIERTISKIKGLVRAPQVYILPPPAEQLSRKDVSLTCL<br>VVGFNPGDISVEWTSNGHTEENYKDTAPVLDSGYSYFIYSKLDIKTSKWE<br>KTDSFSCNVRHEGLKNYYLKKTISRSPGK |
| >3F6-mIgG3<br><br>mIgG3: Uniprot No. P03987-2     | MDLRLTYVFIVAILKGVLCVQLVETGGGLVQPKGSLKLSCAASGFTFNTN<br>AMNWVRQAPGKGLEWVARIRSKSNNYATYYADSVKDRFSISRDDSQNM<br>LSLQMNNLKTEDTAIYYCVTEHYDYDYVMDYWGQGSTVTVSSTTTAPS<br>VYPLVPGCSDTSGSSVTLGCLVKGYFPEPVTVKWNYGALSSGVRTVSSV<br>LQSGFYLSLTVPSSTWPSQTVICNVAHPASKTELIKRIEPRIPKPSTPP<br>GSSCPPGNILGGPSVFIFPPKPKDALMISLTPKVTCVVVDVSEDDPDVHV<br>SWFVDNKEVHTAWTQPREAQYNSTFRVVSALPIQHQDWMRGKEFKCK<br>VNNKALPAPIERTISKPKGRAQTPQVYTIPPPREQMSKKKVSILTCLVTNFF<br>SEAISVEWERNGELEQDYKNTPPILDSDGTYFLYSKLTVDTDSWLQGEIF<br>TCSVVHEALHNHHTQKNLSRSPGK         |
| <b>Shared κ light chain</b>                       |                                                                                                                                                                                                                                                                                                                                                                                                                                                                                                                                 |
| >3F6                                              | METDTLLLWVLLLWVPGSTGDIVLTQSPASLAVSLGQRATISCRASESVEY<br>SGASLMQWYQHKPGQPPKLLIYAASNVESGVPARFSGSGSGTDFSLNIH<br>PVEEDDIAMYFCQQSRKVPSTFGGGTKLEIKRADAAPTVSIFPPSSEQLT<br>SGGASVVCFLNMFYPKDINVKWKIDGSERQNGVLNSWTDQDSKDSTYS<br>MSSTLTLTKDEYERHNSYTCEATHKTSTSPIVKSFNRENC                                                                                                                                                                                                                                                                  |



**Table S2.** Raw data plotted in Fig. 1D to assess the association of SpA to human IgG in the presence of recombinant and hybridoma 3F6 antibodies as well as isotype controls.

| Experiment #      | OD <sub>450</sub> values |        |        | Relative hIgG binding |          |          |
|-------------------|--------------------------|--------|--------|-----------------------|----------|----------|
|                   | 1                        | 2      | 3      | 1                     | 2        | 3        |
| PBS               | 3.5441                   | 3.5164 | 3.5264 | 100.4288              | 99.6439  | 99.92727 |
| mIgG1             | 3.4486                   | 3.3931 | 3.3429 | 97.72266              | 96.14996 | 94.72745 |
| 3F6-mIgG1         | 0.4488                   | 0.4438 | 0.4532 | 12.7176               | 12.57592 | 12.84229 |
| mIgG2a            | 2.2591                   | 2.2133 | 2.1778 | 64.0159               | 62.71807 | 61.71211 |
| 3F6-mIgG2a        | 0.1792                   | 0.192  | 0.2153 | 5.077973              | 5.440686 | 6.100936 |
| hybridoma mAb 3F6 | 0.7056                   | 0.7052 | 0.6869 | 19.99452              | 19.98319 | 19.46462 |
| mIgG2b            | 3.4216                   | 3.411  | 3.4084 | 96.95756              | 96.65719 | 96.58351 |
| 3F6-mIgG2b        | 0.3532                   | 0.1983 | 0.2522 | 10.00859              | 5.619209 | 7.146566 |
| mIgG3             | 2.7463                   | 2.756  | 2.6511 | 77.82165              | 78.09651 | 75.12397 |
| 3F6-mIgG3         | 0.3322                   | 0.315  | 0.3198 | 9.41352               | 8.926125 | 9.062142 |

**Table S3.** Passive immunization of mice with various 3F6-mlgG antibodies following bloodstream challenge with MW2 (from data shown in Fig. 1E-H; *SI Appendix*, Fig. S2B-E).

| <b>Species</b>   |                                | <b>C57BL/7J</b>                             |                            |                              |                                            |                            |
|------------------|--------------------------------|---------------------------------------------|----------------------------|------------------------------|--------------------------------------------|----------------------------|
| <b>Data</b>      |                                | <b>Staphylococcal load in renal tissues</b> |                            |                              | <b>Abscesses in renal tissues</b>          |                            |
| <b>Treatment</b> | <b>No. of mice<sup>a</sup></b> | <b>Log<sub>10</sub>CFU g<sup>-1b</sup></b>  | <b>P value<sup>c</sup></b> | <b>Reduction<sup>d</sup></b> | <b>No. of abscesses/kidney<sup>e</sup></b> | <b>P value<sup>f</sup></b> |
| PBS              | 10                             | 7.44 ± (6.62-7.95)                          |                            |                              | 10.50 ± (7.94-12.66)                       |                            |
| mlgG1            | 18                             | 6.97 ± (6.59-7.39)                          | 0.7069                     | 0.3                          | 10.00 ± (9.08-12.03)                       | 0.9566                     |
| 3F6-mlgG1        | 20                             | 5.81 ± (5.47-6.73)                          | 0.0381                     | 1.19                         | 6.38 ± (5.38-8.27)                         | 0.0708                     |
| mlgG2a           | 19                             | 7.34 ± (6.28-7.65)                          | 0.7069                     | 0.33                         | 11.00 ± (9.41-11.91)                       | 0.9566                     |
| 3F6-mlgG2a       | 20                             | 6.02 ± (5.31-6.35)                          | 0.0042                     | 1.51                         | 4.75 ± (3.61-6.91)                         | 0.0019                     |
| mlgG2b           | 19                             | 6.70 ± (5.97-7.31)                          | 0.449                      | 0.65                         | 9.5 ± (6.65-10.83)                         | 0.6825                     |
| 3F6-mlgG2b       | 20                             | 5.70 ± (5.45-6.03)                          | 0.0035                     | 1.55                         | 8.25 ± (6.94-9.96)                         | 0.6121                     |
| mlgG3            | 19                             | 6.70 ± (6.23-7.12)                          | 0.449                      | 0.61                         | 9.00 ± (7.24-10.84)                        | 0.7287                     |
| 3F6-mlgG3        | 20                             | 6.12 ± 1(5.56-6.63)                         | 0.0593                     | 1.1                          | 9.38 ± (6.36-10.09)                        | 0.5469                     |
| <b>Species</b>   |                                | <b>BALB/cJ</b>                              |                            |                              |                                            |                            |
| <b>Data</b>      |                                | <b>Staphylococcal load in renal tissues</b> |                            |                              | <b>Abscesses in renal tissues</b>          |                            |
| <b>Treatment</b> | <b>No. of mice<sup>a</sup></b> | <b>Log<sub>10</sub>CFU g<sup>-1b</sup></b>  | <b>P value<sup>c</sup></b> | <b>Reduction<sup>d</sup></b> | <b>No. of abscesses/kidney<sup>e</sup></b> | <b>P value<sup>f</sup></b> |
| PBS              | 20                             | 6.84 ± (6.67-7.19)                          |                            |                              | 9.00 ± (7.18-10.82)                        |                            |
| mlgG1            | 8                              | 7.40 ± (6.81-8.08)                          | 0.7223                     | -0.52                        | 8.00 ± (2.58-15.67)                        | 0.9583                     |
| 3F6-mlgG1        | 20                             | 5.10 ± (4.17-5.55)                          | < 0.0001                   | 2.07                         | 6.00 ± (3.66-7.84)                         | 0.2063                     |
| mlgG2a           | 7                              | 7.37 ± (5.76-8.04)                          | 0.9565                     | 0.03                         | 3 ± (-0.49-11.63)                          | 0.3173                     |
| 3F6-mlgG2a       | 20                             | 4.77 ± (3.81-5.13)                          | < 0.0001                   | 2.46                         | 1.50 ± (1.34-3.76)                         | 0.004                      |
| mlgG2b           | 10                             | 7.20 ± (6.76-7.99)                          | 0.7223                     | -0.44                        | 9.50 ± (5.40-22)                           | 0.1622                     |
| 3F6-mlgG2b       | 20                             | 4.72 ± (4.12-5.29)                          | < 0.0001                   | 2.23                         | 2.00 ± (1.88-5.62)                         | 0.0296                     |
| mlgG3            | 9                              | 7.22 ± (6.86-8.09)                          | 0.7223                     | -0.55                        | 11.00 ± (7.27-20.51)                       | 0.1622                     |
| 3F6-mlgG3        | 20                             | 5.18 ± (3.63-5.21)                          | < 0.0001                   | 2.51                         | 3.00 ± (2.25-6.95)                         | 0.0932                     |

<sup>a</sup> Number of 6-week-old female C57BL/6J and BALB/cJ mice.

<sup>b</sup> Staphylococcal load in homogenized renal tissues 15 days following infection. Values are medians ± (lower and upper 95% CI of mean).

<sup>c</sup> P value calculated with One-way ANOVA with Kruskal–Wallis’s test.

<sup>d</sup> Reduction in bacterial load, calculated as log<sub>10</sub> CFU g<sup>-1</sup>.

<sup>e</sup> Surface renal abscesses. Values are medians ± (lower and upper 95% CI of mean)

<sup>f</sup> P value calculated with One-way ANOVA with Kruskal–Wallis’s test.

**Table S4.** Half maximal effective concentration (EC<sub>50</sub>) values for all binding experiments using ELISA.

| Ligand                                | EC <sub>50</sub><br>(M) | 3F6-<br>mIgG1   | 3F6-<br>mIgG2a   | 3F6-<br>mIgG2b   | 3F6-<br>mIgG3   | hybri 3F6<br>(mIgG2a) |
|---------------------------------------|-------------------------|-----------------|------------------|------------------|-----------------|-----------------------|
| SpA <sub>KKAA</sub><br>(from Fig. 1C) | 10 <sup>-10</sup>       | 1.689 ±<br>0.41 | 1.967 ±<br>0.73  | 2.681 ±<br>0.13  | 3.088 ±<br>0.14 | 2.328 ±<br>0.66       |
| C57BL/6J C1q<br>(from Fig. 4A)        | 10 <sup>-8</sup>        | <               | 1.931 ±<br>0.33  | 3.972 ±<br>0.71  | 3.108 ±<br>0.73 | 2.340 ±<br>0.27       |
| BALB/cJ C1q<br>(from Fig. 4A)         | 10 <sup>-8</sup>        | <               | 2.129 ±<br>0.39  | 3.511 ±<br>0.59  | 3.538 ±<br>0.76 | 2.684 ±<br>0.39       |
| C57BL/6J mFcyRIII<br>(from Fig. 4C)   | 10 <sup>-8</sup>        | 4.029 ±<br>0.25 | 0.636 ±<br>0.027 | 0.295 ±<br>0.134 | <               | --                    |
| BALB/cJ mFcyRIII<br>(from Fig. 4A)    | 10 <sup>-8</sup>        | 1.992 ±<br>0.10 | 0.536 ±<br>0.026 | 0.231 ±<br>0.094 | <               | --                    |
| mFcRn pH6.0<br>(from Fig. 4D)         | 10 <sup>-8</sup>        | 5.610 ±<br>0.62 | 2.344 ±<br>0.27  | 2.062 ±<br>0.41  | 2.517 ±<br>0.36 | 1.639 ±<br>0.27       |

Symbols are as follows: -- binding was not measured; < binding was too low to determine association.

**Dataset S1 (separate file).** Non-synonymous single nucleotide polymorphisms (nsSNPs) in the *C1qa*, *C1qb*, *C1qc*, and *Fcgr3* genes.

Sequences for the *C1qa*, *C1qb*, *C1qc*, and *Fcgr3* genes were retrieved from the Mouse Genome Database (MGD: <http://www.informatics.jax.org>) and analyzed to identify non-synonymous single nucleotide polymorphisms (nsSNPs) that result in amino acid differences in coding sequences between C57BL/6J and BALB/cJ animals. The data is shown in an excel file with a different sheet for each gene. nsSNPs considered in this study are highlighted in yellow.

**Dataset S2 (separate file).** SNPs in introns and other untranslated regions of FcγR and complement genes that could result in differential expression.

Sequences were retrieved from the Mouse Genome Database (<http://www.informatics.jax.org>) and analyzed to identify single nucleotide polymorphisms (nsSNPs) that could result in differential expression of the genes. The data is shown in an excel file with a different sheet for each gene.

## SI References

1. Q. Yang, L. X. Wang, Mammalian alpha-1,6-Fucosyltransferase (FUT8) Is the Sole Enzyme Responsible for the N-Acetylglucosaminyltransferase I-independent Core Fucosylation of High-mannose N-Glycans. *J Biol Chem* **291**, 11064-11071 (2016).
2. B. D. Prater, H. M. Connelly, Q. Qin, S. L. Cockrill, High-throughput immunoglobulin G N-glycan characterization using rapid resolution reverse-phase chromatography tandem mass spectrometry. *Anal Biochem* **385**, 69-79 (2009).
